# Supplementary material
Source: Springer Nature journal article supplement (https://www.springermedizin.de/resource/supplementary/12960_2008_180_MOESM2_ESM.pdf/9570584)

Sex (%)

120,00

100,00

80,00

60,00

40,00

20,00

0,00

Non Permanent Workers

Permanent Workers

Total

2002

2003

2004

2005

2006

Year

Fem

Masc

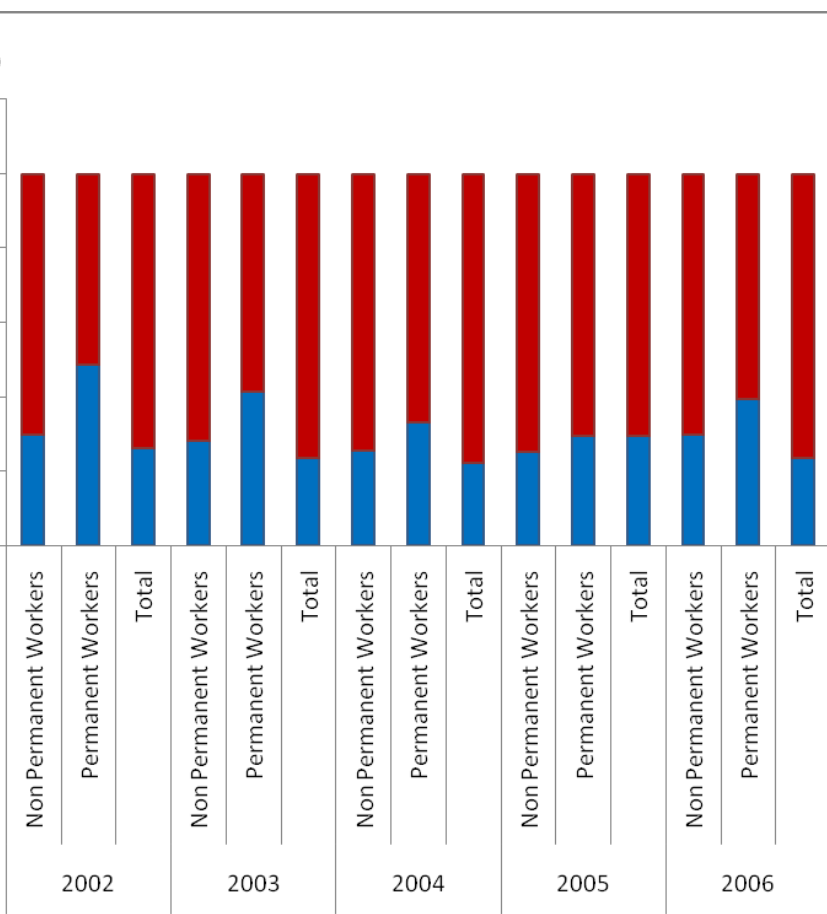

Supplement: MOESM2 [file 9570584]
